# Supplementary material for: Electrodeposited-film electrodes derived from a precursor dinitrosyl iron complex for electrocatalytic water splitting
Source: Royal Society of Chemistry journal article supplement (doi:10.1039/c8dt00601f), 2018-01-01
Supplement: c8dt00601f1.pdf [file c8dt00601f1.pdf]

## Supplementary Information

### **Electrodeposited-Film Electrodes Derived from A Precursor Dinitrosyl Iron Complex for Electrocatalytic Water Splitting**

Wei-Liang Li,<sup>†</sup> Tzung-Wen Chiou,<sup>†\*</sup> Chien-Hong Chen,<sup>‡</sup> Yi-Ju Yu,<sup>†</sup> Li-Kang Chu<sup>†</sup>  
and Wen-Feng Liaw<sup>†\*</sup>

<sup>†</sup>Department of Chemistry, National Tsing Hua University, Hsinchu 30013, Taiwan

<sup>‡</sup>Department of Medical Applied Chemistry, Chung Shan Medical University and  
Department of Medical Education, Chung Shan Medical University Hospital,  
Taichung 40201, Taiwan

\* e-mail: [d9623817@oz.nthu.edu.tw](mailto:d9623817@oz.nthu.edu.tw) (TWC) & [wfliaw@mx.nthu.edu.tw](mailto:wfliaw@mx.nthu.edu.tw) (WFL)

## Experimental Section

Manipulations, reactions, and transfers were conducted under N<sub>2</sub> according to Schlenk techniques or in a glovebox (N<sub>2</sub> gas). Solvents were distilled under N<sub>2</sub> from appropriate drying agents (diethyl ether from CaH<sub>2</sub>; acetonitrile from CaH<sub>2</sub>/P<sub>2</sub>O<sub>5</sub>; methylene chloride from CaH<sub>2</sub>; hexane and THF from sodium benzophenone) and stored in dried, N<sub>2</sub>-filled flasks over 4-Å molecular sieves. N<sub>2</sub> was purged through these solvents before use. The solvent was transferred to the reaction vessel via a stainless cannula under positive pressure of N<sub>2</sub>. The reagents and materials iron pentacarbonyl, nitrosonium tetrafluoroborate [NO][BF<sub>4</sub>], nitrosonium hexafluoroantimonate [NO][SbF<sub>6</sub>], tris[2-(dimethylamino)ethyl]amine (Me<sub>6</sub>tren), platinum on carbon (40 wt. % Pt/C, Pt on an activated carbon support), 99.9% IrO<sub>2</sub> powder, Nafion<sup>®</sup> perfluorinated resin solution (5 wt. % in lower aliphatic alcohols and water, contains 15-20% water) (Sigma-Aldrich), FeCl<sub>2</sub>, FeCl<sub>3</sub>, Fe<sub>2</sub>(SO<sub>4</sub>)<sub>3</sub>, Fe(NO<sub>3</sub>)<sub>3</sub> (Alfa Aesar), bis(triphenylphosphoranylidene)ammonium chloride ([PPN][Cl]; Fluka), platinum disk electrode (surface area = 0.0707 cm<sup>2</sup>) (ALS), glassy carbon disk electrode (surface area = 0.0707 cm<sup>2</sup>, CH instruments), graphite plate (R8340, 50×4×1 mm, 12 μΩm resistivity, Great Carbon Co., Ltd., Taiwan) were used as received. Compounds [PPN][Fe(CO)<sub>3</sub>(NO)], [Fe(CO)<sub>2</sub>(NO)<sub>2</sub>], and [(PMDTA)Fe(NO)<sub>2</sub>][BF<sub>4</sub>] (PMDTA = pentamethyldiethylenetetraamine) were synthesized based on the reported procedures.<sup>1-2</sup> IR and ATR-IR spectra of the ν<sub>(NO)</sub> stretching frequencies were recorded on a PerkinElmer model spectrum one B spectrometer with sealed solution cells (0.1 mm, CaF<sub>2</sub> windows) and a VERTEX 80 BioATR II. <sup>1</sup>H NMR spectra were obtained on a Varian Unity-500 spectrometer. UV-vis spectra were recorded on a Jasco V-570 spectrometer. Analyses of C, H, and N were obtained with a CHN analyzer (Heraeus).

**Preparation of [(Me<sub>6</sub>tren)Fe(NO)<sub>2</sub>] (1) (Me<sub>6</sub>tren = tris[2-**

**(dimethylamino)ethyl]amine).** Ligand Me<sub>6</sub>tren (0.30 mL, 1.1 mmol) was added into the THF solution (10 mL) of [Fe(CO)<sub>2</sub>(NO)<sub>2</sub>], freshly prepared from reaction of [PPN][Fe(CO)<sub>3</sub>(NO)] (0.712 g, 1.0 mmol) and [NO][BF<sub>4</sub>] (0.120 g, 1.1 mmol), and the reaction solution was stirred for 4 h under N<sub>2</sub> at ambient temperature. The reaction was monitored with FTIR. The appearance of IR  $\nu_{(\text{NO})}$  stretching frequencies at 1697, 1643 cm<sup>-1</sup> (THF) was assigned to the formation of [(Me<sub>6</sub>tren)Fe(NO)<sub>2</sub>] (**1**). Complex **1** was isolated as dark brown semi-oil. IR:  $\nu_{(\text{NO})}$  1697, 1643 cm<sup>-1</sup> (THF). <sup>1</sup>H NMR (C<sub>4</sub>D<sub>8</sub>O):  $\delta$  2.47 (br (CH<sub>2</sub>, CH<sub>3</sub>)).

**Preparation of [(Me<sub>6</sub>tren)Fe(NO)<sub>2</sub>][SbF<sub>6</sub>] (**2**).** To a 30-mL Schlenk flask loaded with [NO][SbF<sub>6</sub>] (or [NO][BF<sub>4</sub>]) (0.292 g (or 0.120 g), 1.1 mmol) was added the MeCN solution (10 mL) of complex **1** (0.346 g, 1.0 mmol). After stirring for 10 min, the shift of IR  $\nu_{(\text{NO})}$  stretching frequencies from 1689, 1633 cm<sup>-1</sup> to 1765, 1679 cm<sup>-1</sup> indicates the formation of [(Me<sub>6</sub>tren)Fe(NO)<sub>2</sub>][SbF<sub>6</sub>] (**2**). The MeCN solution of **2** was then filtered through Celite to remove the insoluble solid. The THF-diethyl ether was added to precipitate the brown solid **2**. Recrystallization from the MeCN solution of complex **2** layered with diethyl ether at room temperature led to the dark brown crystals suitable for X-ray crystallography. IR:  $\nu_{(\text{NO})}$  1765, 1679 cm<sup>-1</sup> (MeCN). Absorption spectrum (MeCN) [ $\lambda_{\text{max}}$ , nm ( $\epsilon$ , M<sup>-1</sup>cm<sup>-1</sup>): 386 (454), 513 (147), 670 (72), 833 (64). Anal. Calcd. for C<sub>12</sub>H<sub>30</sub>FeN<sub>6</sub>O<sub>2</sub>F<sub>6</sub>Sb: C, 24.76; H, 5.20; N, 14.44. Found: C, 23.69; H, 5.15; N, 14.13.

**EPR Spectroscopy.** EPR measurements were performed at X-band using a Bruker EMX spectrometer equipped with a Bruker TE102 cavity. The microwave frequency was measured with a Hewlett-Packard 5246L electronic counter. X-band EPR spectrum of **2** in MeCN was obtained with a microwave power of 1.5 mW, modulation amplitude of 1.60 G at 100 KHz, and microwave frequency at 9.469 GHz. The spectral simulation was performed using Bruker WinEPR.

**Magnetic Measurements.** The magnetization data was recorded on a SQUID magnetometer (MPMS5 Quantum Design company) with an external 1.0 T magnetic field for **2** in the temperature range 2-300 K. The magnetic susceptibility of the experimental data was corrected for diamagnetism by the tabulated Pascal's constants.

**Crystallography.** Each crystal was mounted on a glass fiber and quickly coated with an epoxy resin. Unit-cell parameters were obtained by least-squares refinement. Diffraction measurement for complex **2** was carried out on a Bruker Kappa Apex DUO diffractometer (Bruker X8 APEX II CCD diffractometer) with graphite-monochromated Mo K $\alpha$  radiation ( $\lambda = 0.7107 \text{ \AA}$ ). Least-squares refinement of the positional and anisotropic thermal parameters of all non-H atoms and fixed H atoms was based on  $F^2$ . A *SADABS* absorption correction was made. The *SHELXTL* structural refinement program was employed. CCDC number: CCDC 1559817 for **2**.

**Electrode Preparation.** 40 wt.% Pt-C (3.6 mg) or IrO<sub>2</sub> (2.1 mg) were dispersed in a 2 mL mixture solution containing 0.8 mL water, 120  $\mu$ L 5% Nafion solution, and 1.08 mL ethanol, followed by sonication for 30 min to obtain a homogeneous catalyst ink. The catalyst ink (50  $\mu$ L for each loading) was loaded on the surfaces of the glassy carbon electrode (surface area: 0.0707 cm<sup>2</sup>) or graphite plate (surface area: 0.16 cm<sup>2</sup>) to achieve the suitable weight.<sup>3</sup>

**Electrochemical Studies.** All electrochemical measurements were performed in a three-electrode cell with a CHI model 621b potentiostat (CH Instrument) instrumentation. Cyclic voltammograms in MeOH were obtained from 3.0 mM analyte concentration in O<sub>2</sub>-free MeOH using 0.1 M [*n*-Bu<sub>4</sub>N][PF<sub>6</sub>] as the supporting electrolyte. The potential was measured at 298 K vs Ag/AgNO<sub>3</sub> reference electrode (0.01 M AgNO<sub>3</sub>, ALS) by using a glassy carbon working electrode (surface area = 0.0707 cm<sup>2</sup>) and a platinum wire auxiliary electrode (ALS) at a scan rate of 50 mV/s. The working electrode was polished with Al<sub>2</sub>O<sub>3</sub> powders with size down to 0.05  $\mu$ m.

The potentials are reported against the ferrocenium/ferrocene ( $\text{Fc}^+/\text{Fc}$ ) couple. In all experiments, the iR compensation was performed by CHI model 621b software. Aqueous cyclic voltammogram (CV) and linear sweep voltammetry (LSV) were obtained from 3.0 mM analyte concentration in 1.0 M NaOH as the supporting electrolyte with the saturated calomel electrode (SCE, ALS) as reference electrode at a scan rate of 2 mV/s. Controlled potential electrolysis (CPE) experiments of complex **2** solution (3.0 mM) were conducted in 25-mL 1.0 M NaOH aqueous solution stirred constantly. The auxiliary electrode in CPE cell was separated from the solution of the working electrode by a medium-porosity sintered-glass frit. To avoid the corrosion of the expensive glassy carbon electrode, graphite plate (surface area = 0.16 cm<sup>2</sup>) was used as the working electrode in the CPE experiments of water oxidation and two-electrode setting. All potentials reported in this paper were converted from vs SCE to vs reversible hydrogen electrode (RHE).

$$\text{RHE} = \text{SCE} + 0.244 + 0.059 \times 14, \text{ for } 1.0 \text{ M NaOH}_{(\text{aq})}$$

**Electrochemical Capacitance Measurements.** The electrochemically active surface area (ECSA) was evaluated in terms of double-layer capacitance. CV scans were conducted in static solution by sweeping the potential from the more positive to negative potential and back at 6 different scan rates: 2, 4, 8, 12, 16 and 20 mV/s. This range is typically a 0.1 V potential window centered on the OCP (open-circuit potential) of the system. The capacitance was determined from the tenth cyclic voltammetry curve of each scan rate. The electrochemical double-layer capacitance,  $C_{\text{DL}}$ , as given by  $i_c = \nu C_{\text{DL}}$  ( $i_c$ : current density from CV,  $\nu$ : scan rate).<sup>4</sup> The specific capacitance for a flat surface is generally found to be in the range of 20-60 mF/cm<sup>2</sup>. We used a value of 40 mF/cm<sup>2</sup> in the following calculations of the electrochemical

active surface area.

**Mass Activity.** The values of mass activity were calculated using the equation, mass activity (A/g) = LSV current (A)/electrocatalyst deposited or loading amount (g).

**Determination of Faradaic Efficiency, TON and TOF of Electrolysis Using DNIC 2-Deposited Electrode.** Quantification of the produced H<sub>2</sub>/O<sub>2</sub> gas was performed by gas chromatography (SRI 8610C) equipped with a molecular sieves (MS-13x) column and helium ionization detector (HID). Helium was used as the carrier gas. Calibration curves were built by the injection of the known amounts of pure H<sub>2</sub>/O<sub>2</sub>. The amounts of H<sub>2</sub>/O<sub>2</sub> dissolved in the solution were corrected by the Henry's law ( $K_H = 7.8 \times 10^{-4}$  mol/atm·L for H<sub>2</sub> and  $1.3 \times 10^{-3}$  mol/atm·L for O<sub>2</sub>).

H<sub>2</sub>: *Faradaic efficiency* (%) = [Charge (CPE)/2/96485]×100%/[V(H<sub>2</sub> gas of GC detection)/24.5]

O<sub>2</sub>: *Faradaic efficiency* (%) = [Charge (CPE)/4/96485]×100%/[V(O<sub>2</sub> gas of GC detection)/24.5]

TON (H<sub>2</sub>) = [Q/2/96485]×[Faradaic efficiency (%)]/[weight of catalyst] (mol/g)

TON (O<sub>2</sub>) = [Q/4/96485]×[Faradaic efficiency (%)]/[weight of catalyst] (mol/g)

Q = accumulated charge of CPE with catalyst – accumulated charge of CPE without catalyst

TOF = [TON]/[time of CPE] (mol/g-h)

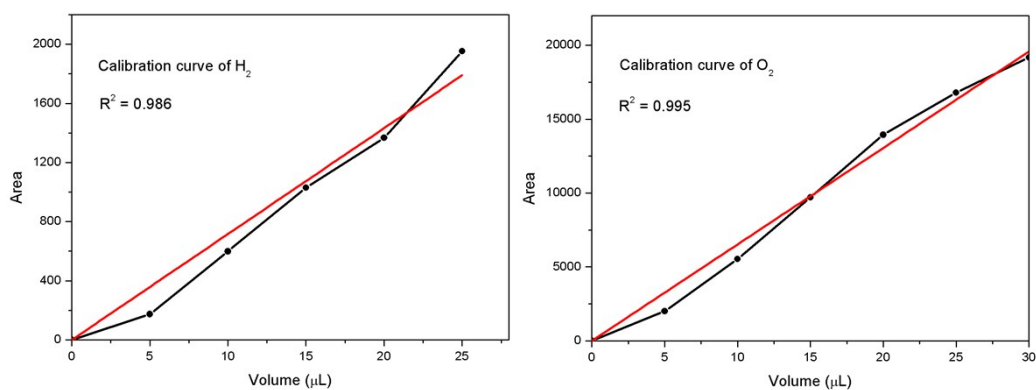

**Inductively Coupled Plasma-Mass Spectrometer (ICP-MS).** ICP-MS was performed on a Agilent 7500ce. Samples were dissolved in concentrated HNO<sub>3</sub>.

**Powder X-ray Diffraction (pXRD).** pXRD data were obtained using a Bruker D8 X-ray Powder Diffractometer with a Cu K- $\alpha$  radiation source in the range  $2\theta = 5$ - $80^\circ$ .

**Scanning Electron Microscope (SEM).** SEM images and EDX spectra were obtained with a JSM 7000F microscope (JEOL) equipped with an Oxford EDX system.

**X-ray Photoelectron Spectroscopy (XPS).** XPS spectra were collected on a ULVAC-PHI XPS spectrometer equipped with a monochromatized 1486.6 eV Al K $\alpha$  X-ray line source directed  $45^\circ$  with respect to the sample surface. The spectra were registered at a base pressure of  $<5 \times 10^{-10}$  torr. Low-resolution survey scans were acquired with a 100  $\mu\text{m}$  spot size between the binding energies of 1-1100 eV. Higher-resolution scans with a resolution of 0.1 eV were collected between 392-412 (for N), 525-541 (for O) and 700-740 (for Fe) eV.

## Reference

- (1) Hung, M.-C.; Tsai, M.-C.; Lee, G.-H.; Liaw, W.-F. *Inorg. Chem.* **2006**, *45*, 6041-6047.

- (2) Chiou, T.-W. *et al.* *Angew Chem Int. Ed.* **2015**, *54*, 14824-14829.
- (3) Jiang, N.; You, B.; Sheng, M.; Sun, Y. *Angew Chem Int. Ed.* **2015**, *54*, 6251-6254.
- (4) McCrory, C. C. L.; Jung, S.; Peters, J. C.; Jaramillo, T. F. *J. Am. Chem. Soc.* **2013**, *135*, 16977-16987.



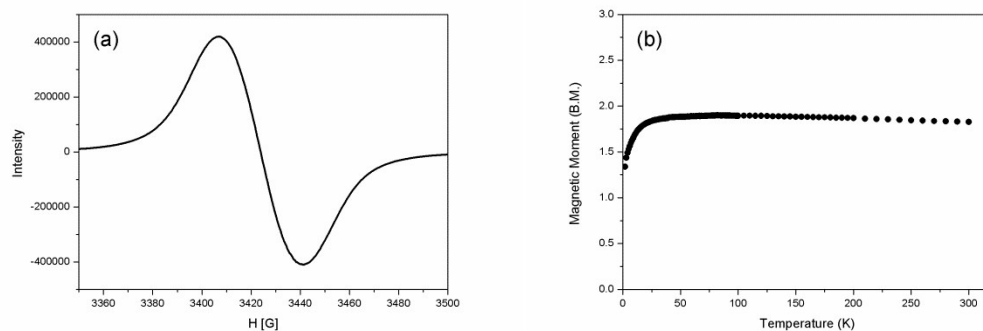

**Figure S1.** (a) EPR spectrum of **2** in MeCN at 77 K. (b) Plot of magnetic moment vs temperature for **2**.

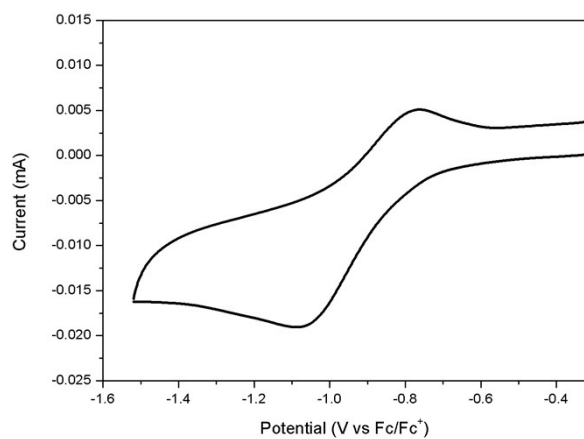

**Figure S2.** Cathodic cyclic voltammogram of 3-mM CH<sub>3</sub>OH solution of **2** with 0.1 M [n-Bu<sub>4</sub>N][PF<sub>6</sub>] as electrolyte ( $E_{pc} = -1.035$  V and  $E_{pa} = -0.766$  V (vs Fc/Fc<sup>+</sup>), scan rate 50 mV/s).

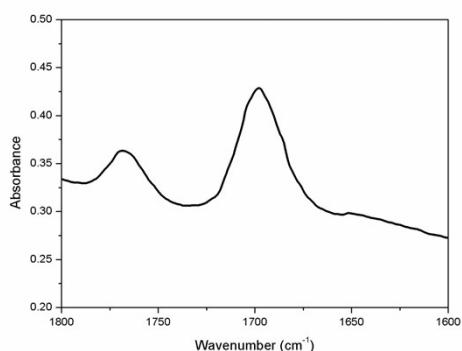

**Figure S3.** IR spectrum of **2** in D<sub>2</sub>O solution of 1.0 M NaOH.

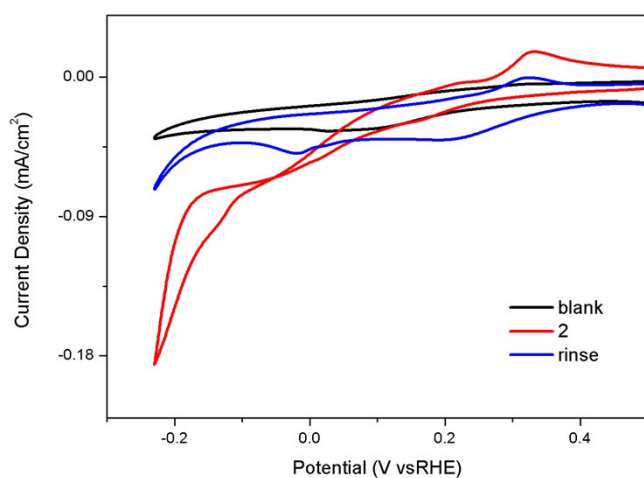

**Figure S4.** CV curves of blank (black), 3-mM aqueous solution of **2** (red) in 1.0 M NaOH<sub>(aq)</sub>, and the CV (blue) obtained after CV scanning followed by rinse and subsequently transferred to fresh DNIC **2**-free aqueous solution with 1.0 M NaOH<sub>(aq)</sub> electrolyte for HER (scan rate 2 mV/s). (Current densities mean geometrical current densities).

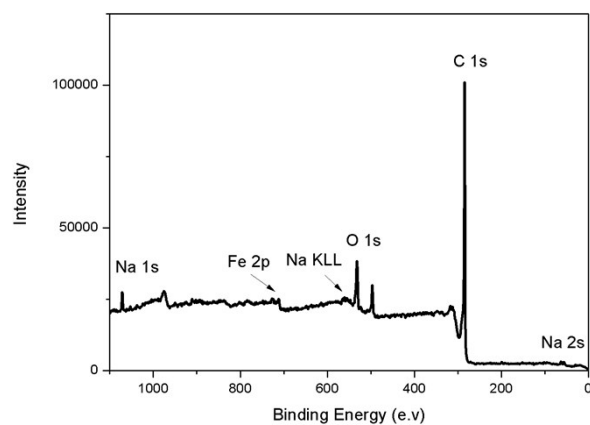

**Figure S5.** XPS spectrum of the graphite electrode after CV scanning for HER catalytic test in the presence of **2** (3 mM) and 1.0 M NaOH<sub>(aq)</sub>.

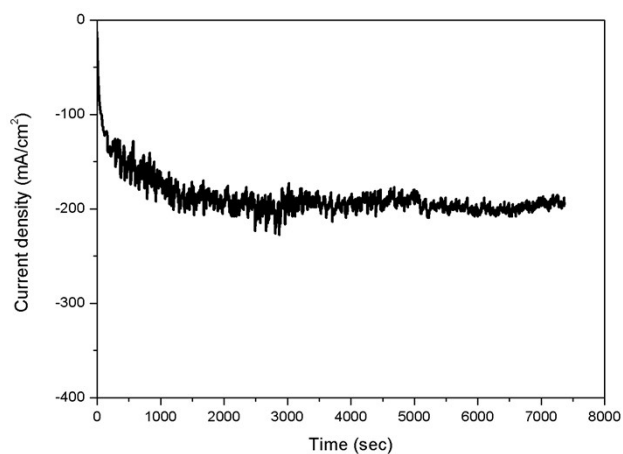

**Figure S6.** Increase of current density with time for the electrolysis of 3 mM **2** in 1.0 M NaOH<sub>(aq)</sub> at applied potential -0.48 V (vs RHE). (Current densities mean geometrical current densities).

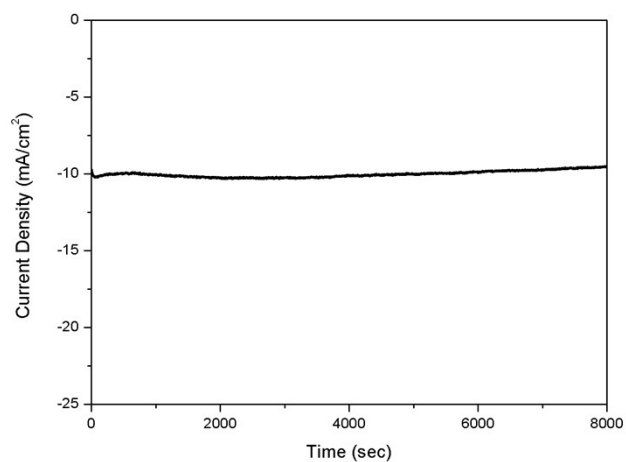

**Figure S7.** Current density of  $-10 \text{ mA/cm}^2$  for HER using **Re-electrode** in  $1.0 \text{ M NaOH}_{(\text{aq})}$  at applied potential  $-0.16 \text{ V}$  (vs. RHE). (Current densities mean geometrical current densities).

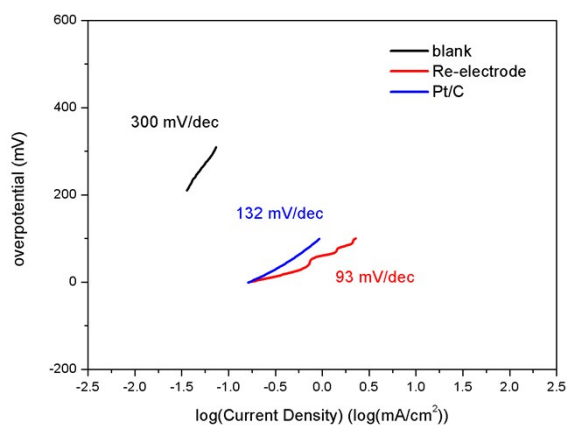

**Figure S8.** The corresponding Tafel plots of blank (black), **Re-electrode** (red), Pt electrode (blue) in  $1.0 \text{ M NaOH}_{(\text{aq})}$  (scan rate  $2 \text{ mV/s}$ ).

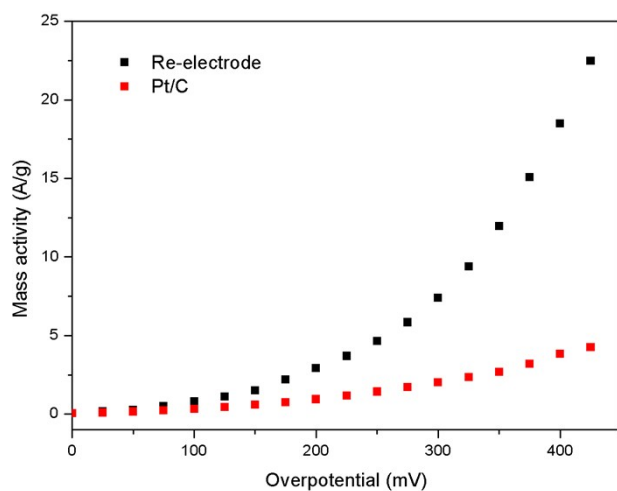

**Figure S9.** Mass activity as a function of the overpotential for **Re-electrode** and Pt/C.

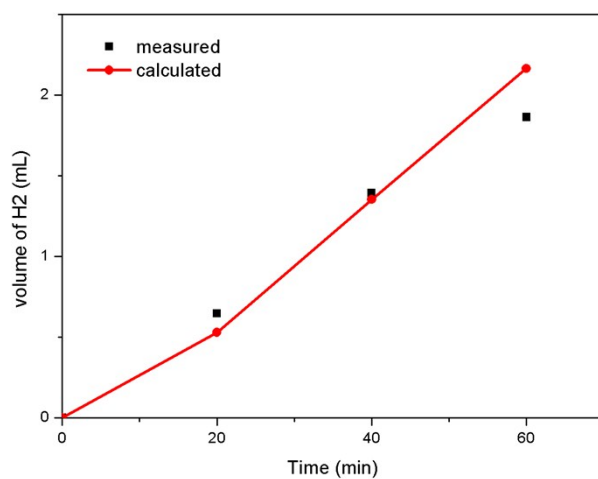

**Figure S10.** The amount of H<sub>2</sub> gas obtained by theoretical calculation (red) and experimental measurements (black) versus time for the electrolysis of 1.0 M NaOH<sub>(aq)</sub> using **Re-electrode** at applied potential -0.48 V (vs. RHE).

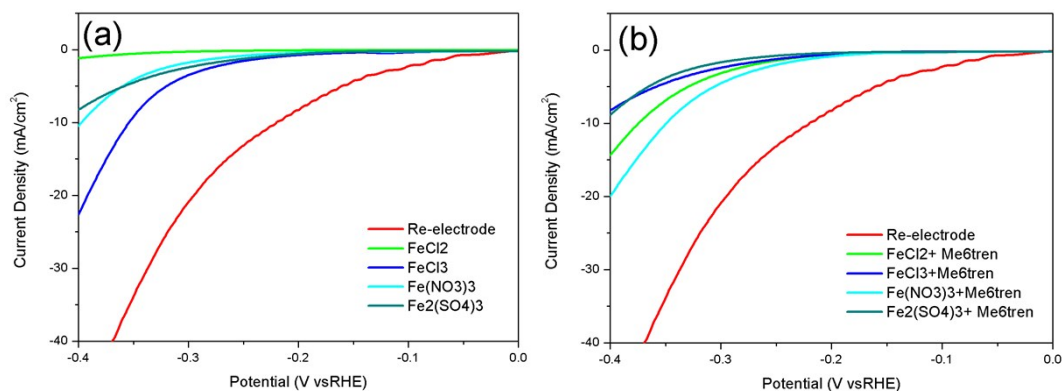

**Figure S11.** LSV curves of **Re-electrode** and electrodeposited electrodes of (a) Fe salts, and (b) Fe salts + Me<sub>6</sub>tren ligand in 1.0 M NaOH<sub>(aq)</sub>. The electrodeposited electrodes prepared by CPE of 1.0 M NaOH<sub>(aq)</sub> with Fe(NO<sub>3</sub>)<sub>3</sub>, Fe<sub>2</sub>(SO<sub>4</sub>)<sub>3</sub>, FeCl<sub>2</sub>, FeCl<sub>3</sub>, [Fe(NO<sub>3</sub>)<sub>3</sub> + Me<sub>6</sub>tren], [Fe<sub>2</sub>(SO<sub>4</sub>)<sub>3</sub> + Me<sub>6</sub>tren], [FeCl<sub>2</sub> + Me<sub>6</sub>tren] and [FeCl<sub>3</sub> + Me<sub>6</sub>tren] (3 mM), respectively, at an applied potential -0.48 V (vs RHE) for 2 h. (Current densities mean geometrical current densities).

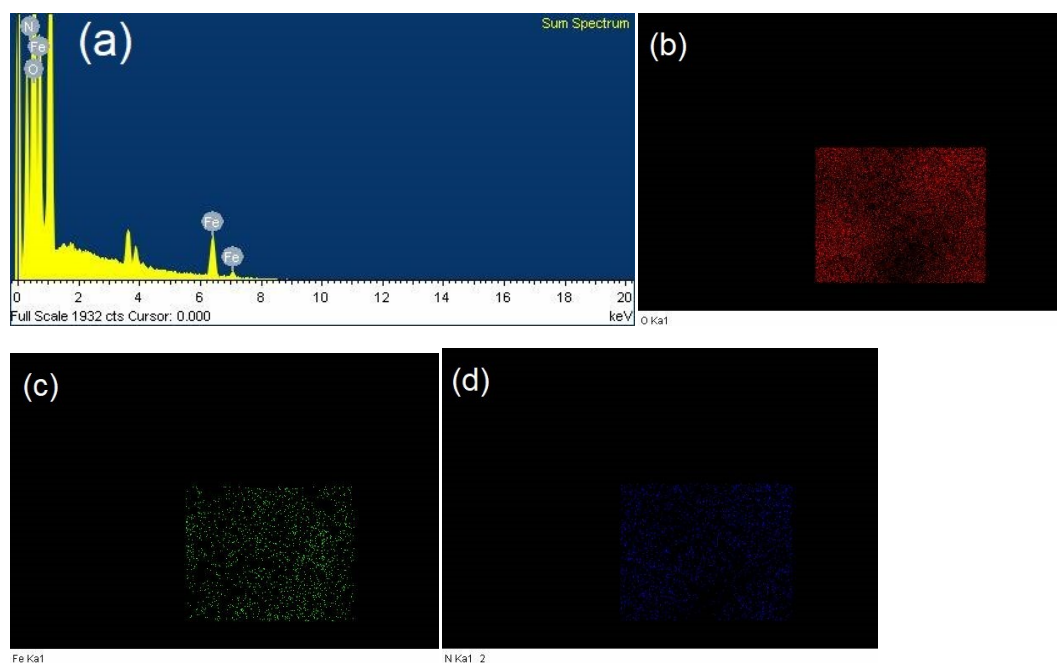

**Figure S12.** (a) EDX spectrum, and (b-d) SEM-EDX elemental maps (N, O, and Fe elements are shown as blue, red, and green, respectively) of **Re-electrode**.

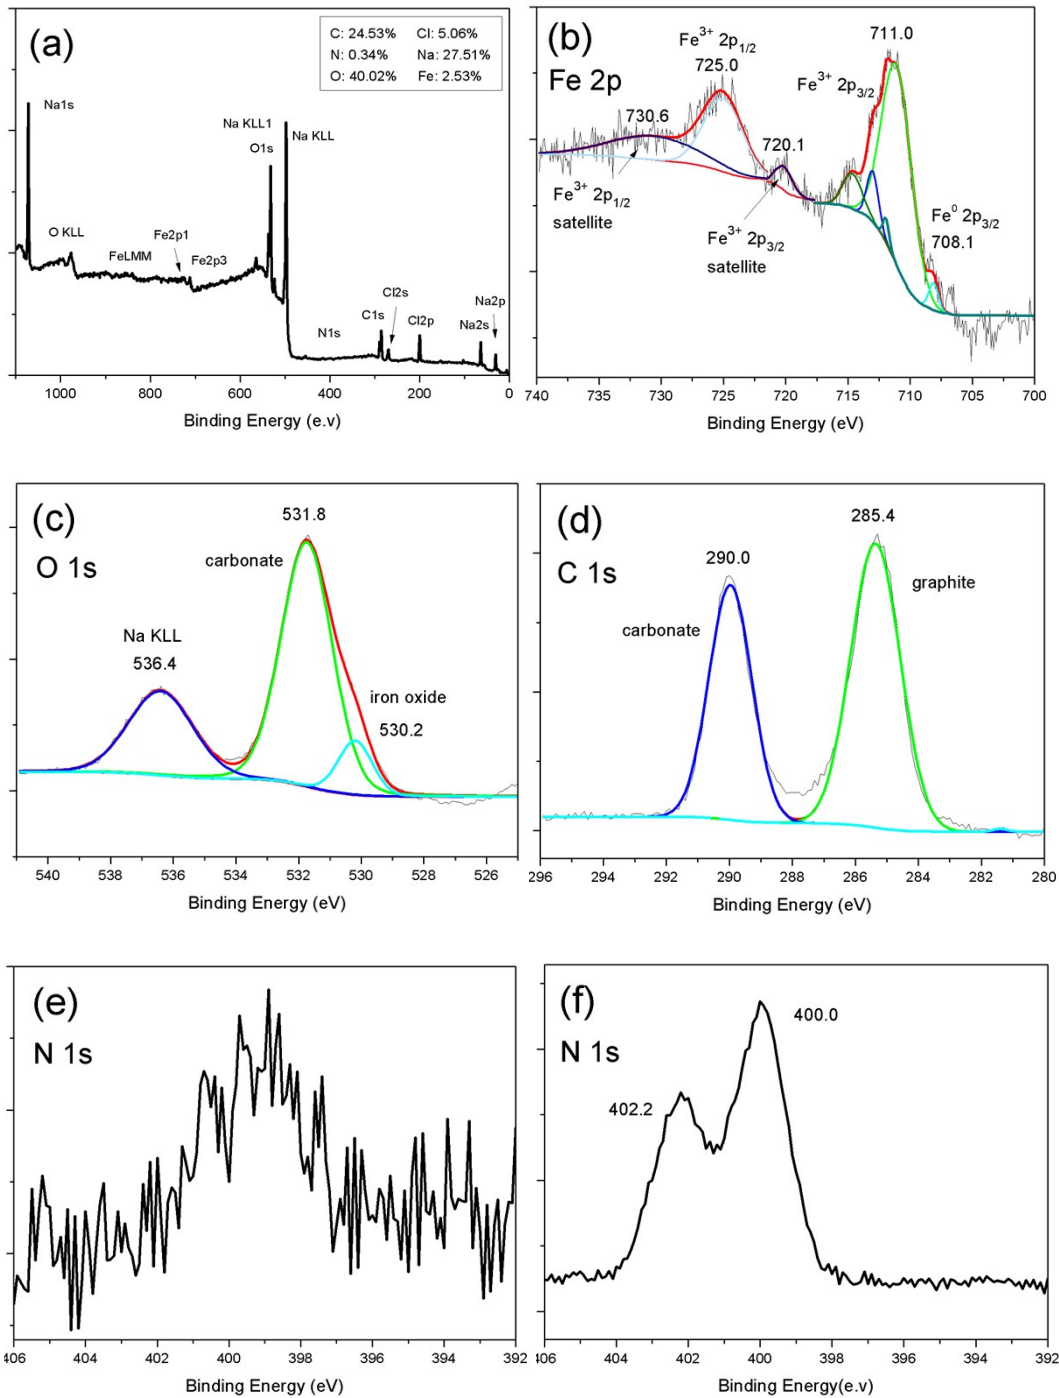

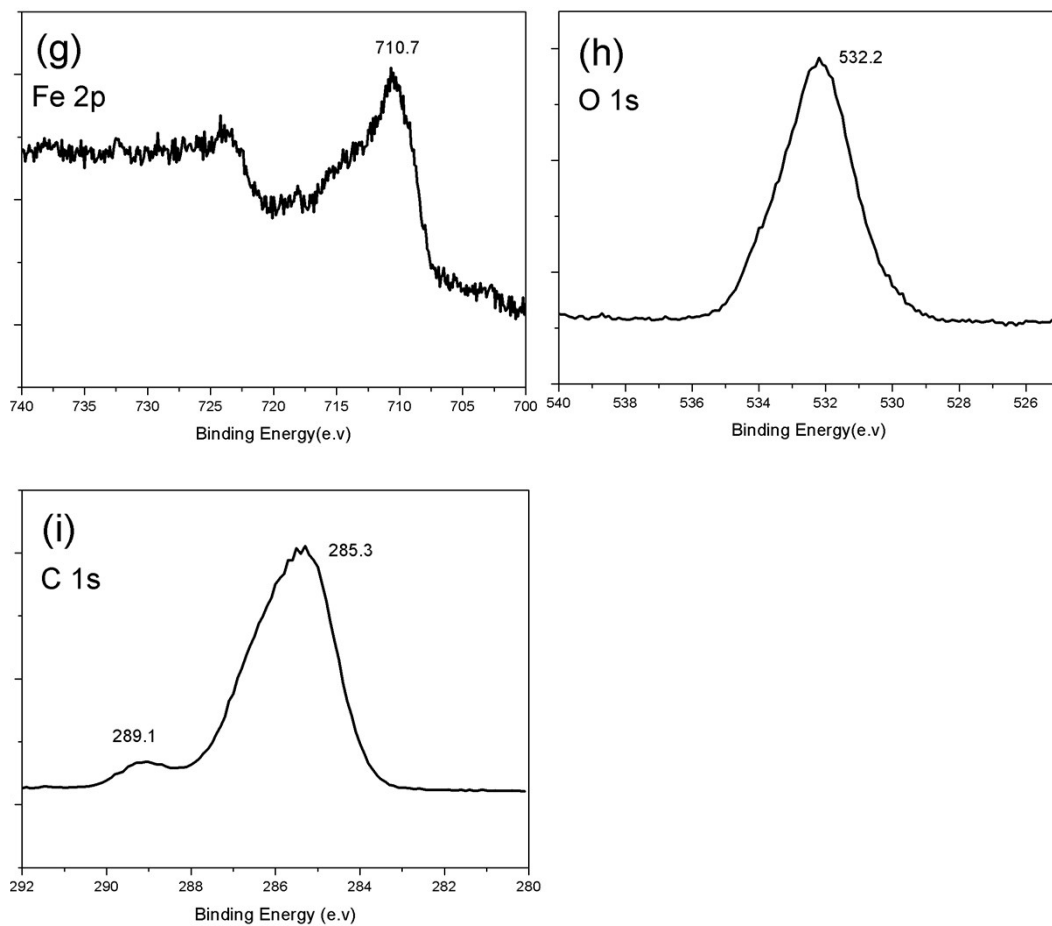

**Figure S13.** (a) Survey, (b) Fe 2p, (c) O 1s, (d) C 1s, and (e) N 1s XPS spectra of **Re-electrode** (Cl element of survey spectrum may be from SCE reference electrode). (f) N 1s, (g) Fe 2p, (h) O 1s, and (i) C 1s XPS spectra of **2**.



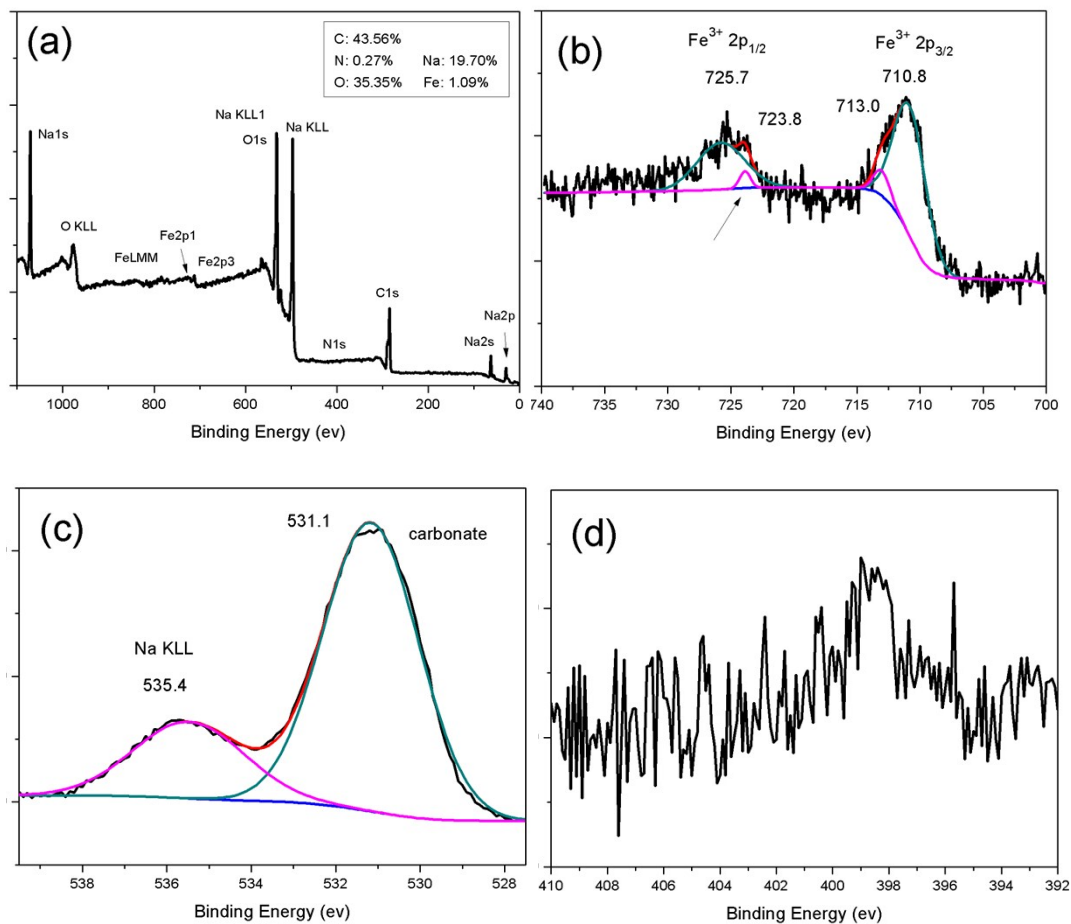

**Figure S14.** (a) Survey, (b) Fe 2p, (c) O 1s and (d) N 1s XPS spectra of **Re-electrode** after the CPE for 60h.

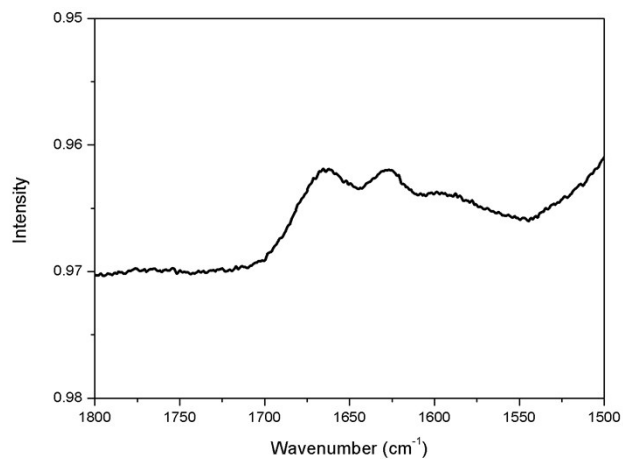

**Figure S15.** ATR-IR spectrum of **Re-electrode**.

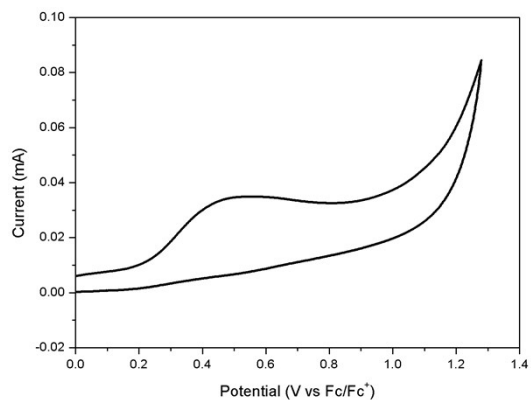

**Figure S16.** Anodic cyclic voltammogram of CH<sub>3</sub>OH solution of **2** (3 mM) with 0.1 M [n-Bu<sub>4</sub>N][PF<sub>6</sub>] electrolyte ( $E_{pa} = 0.51$  V (vs Fc/Fc<sup>+</sup>), scan rate 50 mV/s).

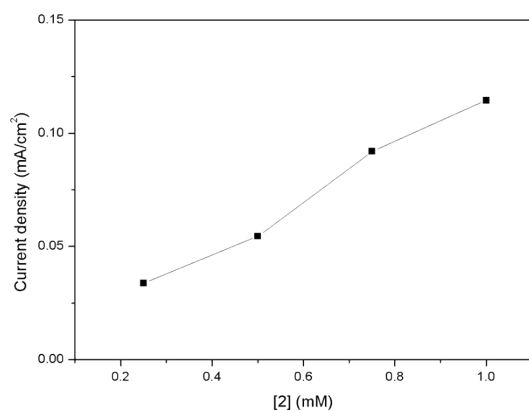

**Figure S17.** Dependence of the catalytic current density on the concentration of **2** in 1.0 M NaOH<sub>(aq)</sub> at applied potential 1.77 V (vs. RHE) for OER (scan rate 2 mV/s). (Current densities mean geometrical current densities).

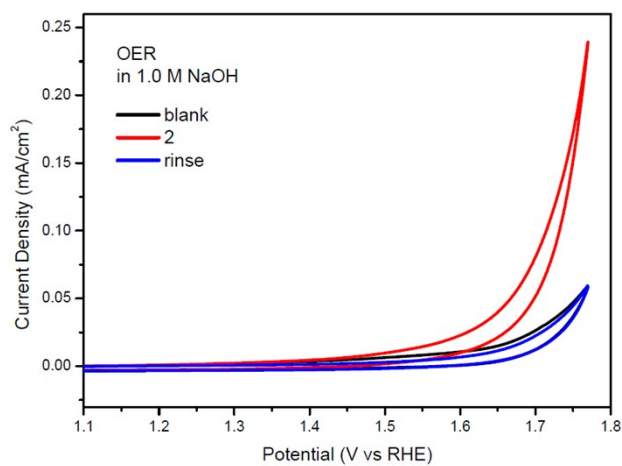

**Figure S18.** CVs of blank (black), 3-mM solution of **2** (red) in 1.0 M NaOH<sub>(aq)</sub>, and the CV (blue) obtained after CV scanning followed by rinse and subsequently transferred to fresh **2**-free aqueous solution with 1.0 M NaOH<sub>(aq)</sub> electrolyte for OER (scan rate 2 mV/s). (Current densities mean geometrical current densities).

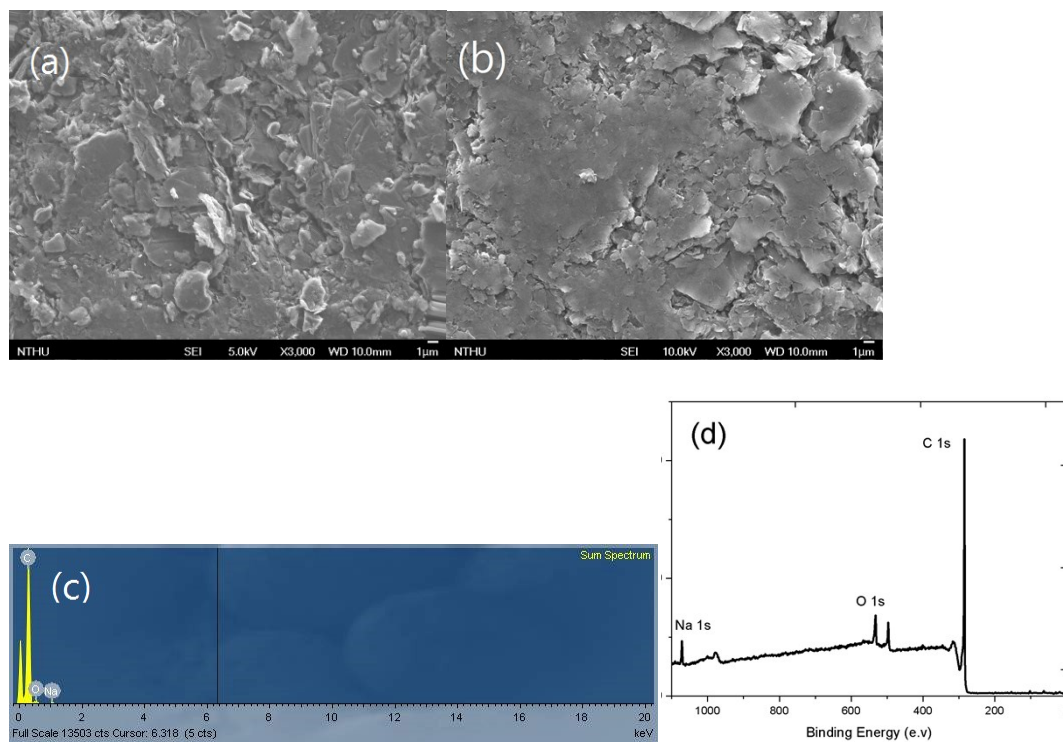

**Figure S19.** SEM, EDX and XPS spectra of the graphite electrodes (a) before and (b-d) after CV scanning OER catalytic test of **2** (3 mM) in 1.0 M NaOH<sub>(aq)</sub>.

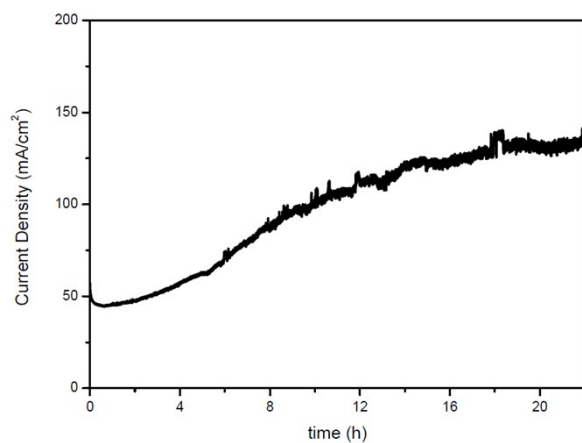

**Figure S20.** Changes of current density with time for the electrolysis of **2** (3 mM) in 1.0 M NaOH<sub>(aq)</sub> at applied potential 1.87 V (vs RHE). (Current densities mean geometrical current densities).

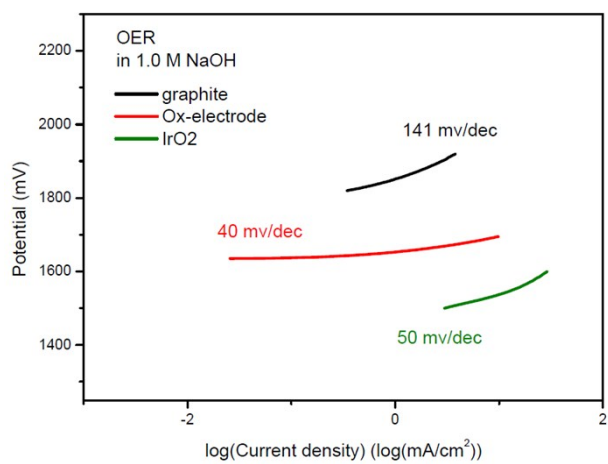

**Figure S21.** The corresponding Tafel plots of graphite (black), **Ox-electrode** (red) and IrO<sub>2</sub> electrode (green) in 1.0 M NaOH<sub>(aq)</sub> for OER (scan rate 2 mV/s).

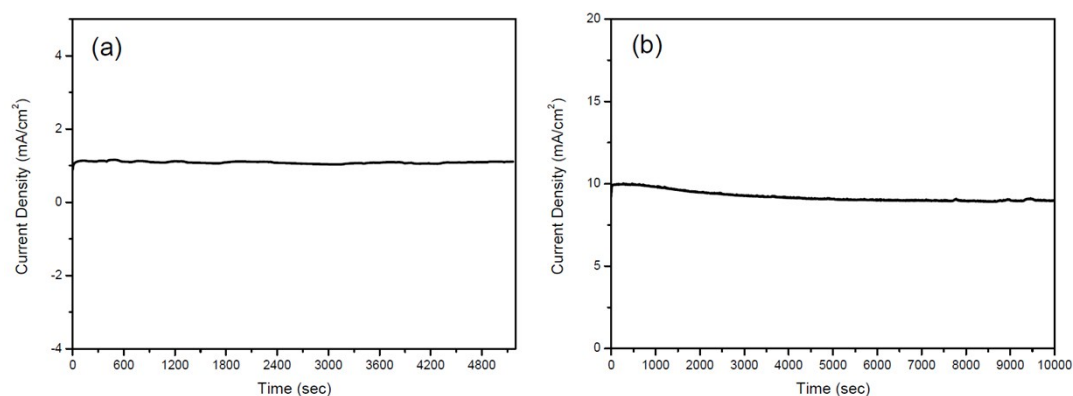

**Figure S22.** Current densities of 1 and 9 mA/cm<sup>2</sup> for OER using **Ox-electrode** in 1.0 M NaOH<sub>(aq)</sub> at applied potential 1.61 and 1.69 V (vs RHE), respectively. (Current densities mean geometrical current densities).

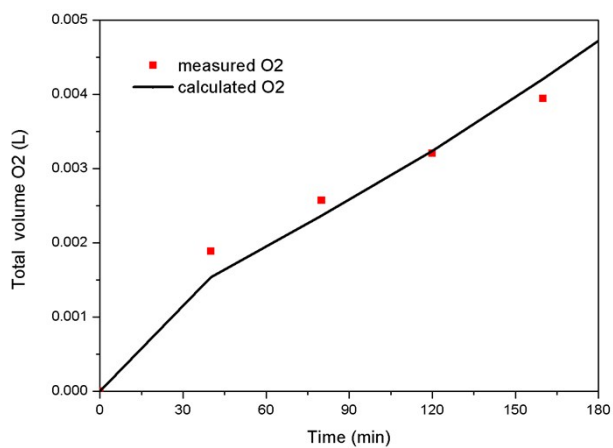

**Figure S23.** The amount of O<sub>2</sub> gas obtained by theoretical calculation (red) and experimental measurements (black) versus time for the controlled potential electrolysis of 1.0 M NaOH<sub>(aq)</sub> employing **Ox-electrode** as working electrode at applied potential 1.87 V (vs. RHE).

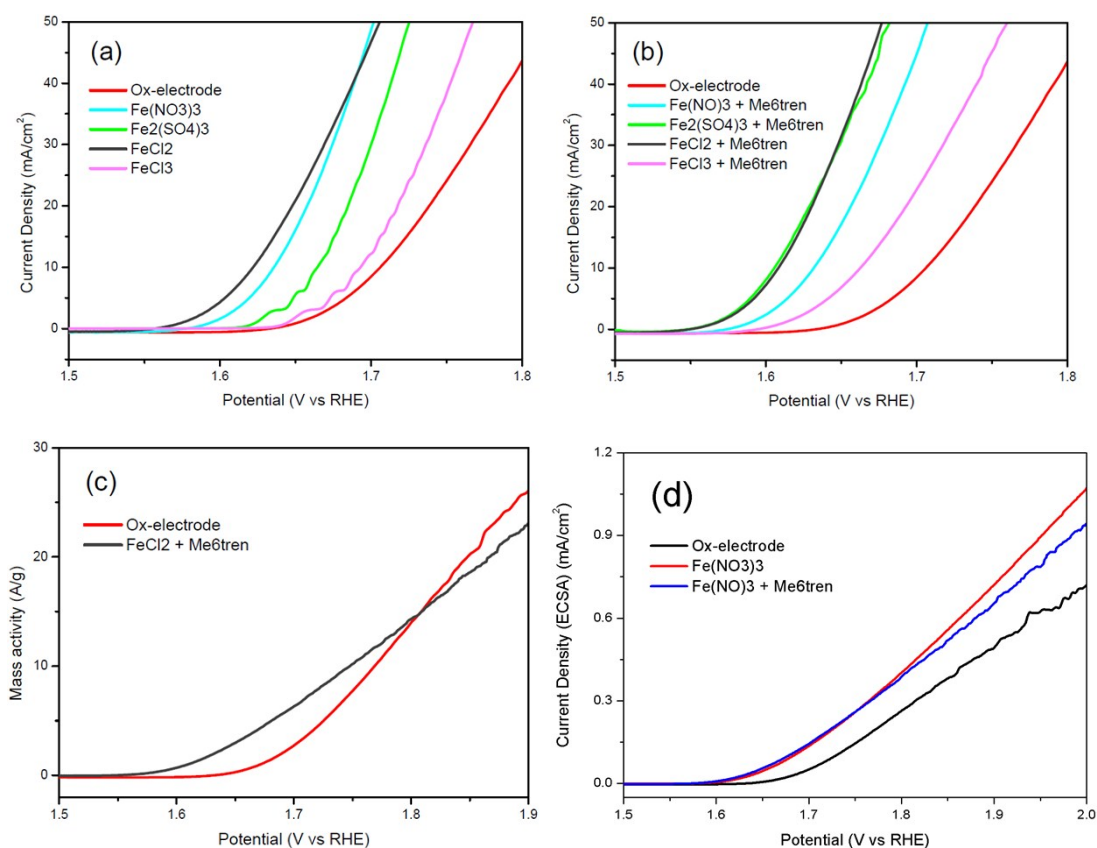

**Figure S24.** LSV curves of **Ox-electrode** and electrodeposited electrodes of (a) Fe salts or (b) Fe salts + Me<sub>6</sub>tren ligand in 1.0 M NaOH<sub>(aq)</sub>. (c) LSV curves based on the active mass of **Ox-electrode** and electrodeposited electrodes of FeCl<sub>2</sub> + Me<sub>6</sub>tren in 1.0 M NaOH<sub>(aq)</sub>. The electrodeposited electrodes prepared by CPE of 1.0 M NaOH<sub>(aq)</sub> with Fe(NO<sub>3</sub>)<sub>3</sub>, Fe<sub>2</sub>(SO<sub>4</sub>)<sub>3</sub>, FeCl<sub>2</sub>, FeCl<sub>3</sub>, [Fe(NO<sub>3</sub>)<sub>3</sub>+Me<sub>6</sub>tren], [Fe<sub>2</sub>(SO<sub>4</sub>)<sub>3</sub>+Me<sub>6</sub>tren], [FeCl<sub>2</sub>+Me<sub>6</sub>tren], and [FeCl<sub>3</sub>+Me<sub>6</sub>tren] (3 mM), respectively, at applied potential 1.87 V (vs. RHE) for 22 h. (d) The LSV curves from Fig. S24a-b normalized to the electrochemical active surface area (ECSA). In Figures S24a-b, current densities mean geometrical current densities.

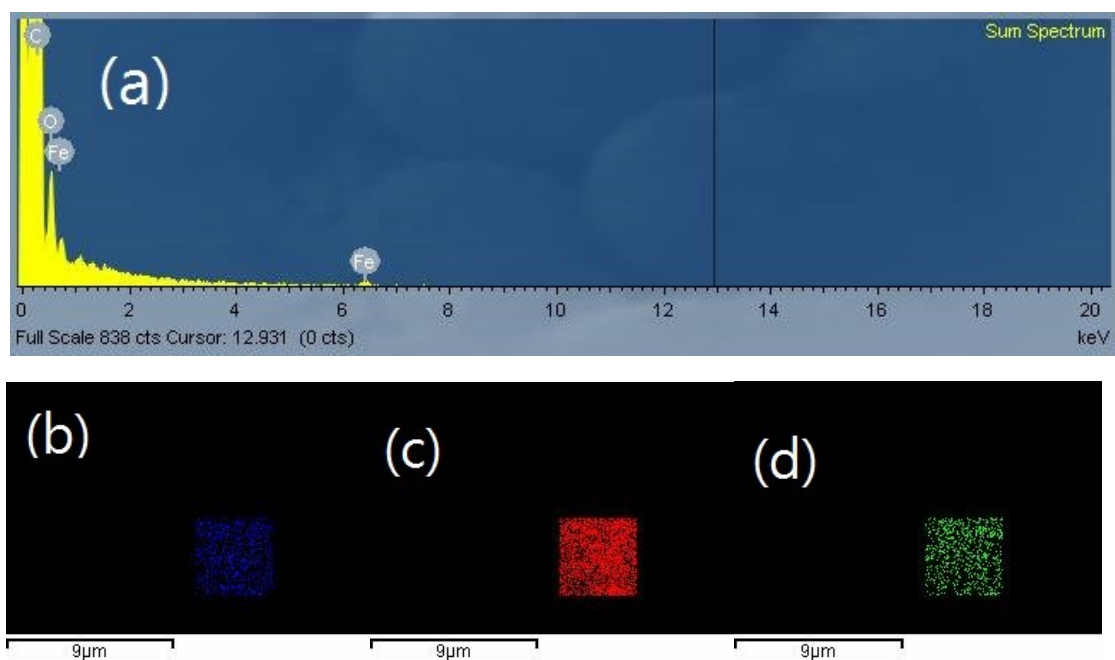

**Figure S25.** (a) EDX spectrum, and (b-d) SEM-EDX elemental maps (N, O, and Fe elements are shown as blue, red, and green, respectively) of **Ox-electrode**.



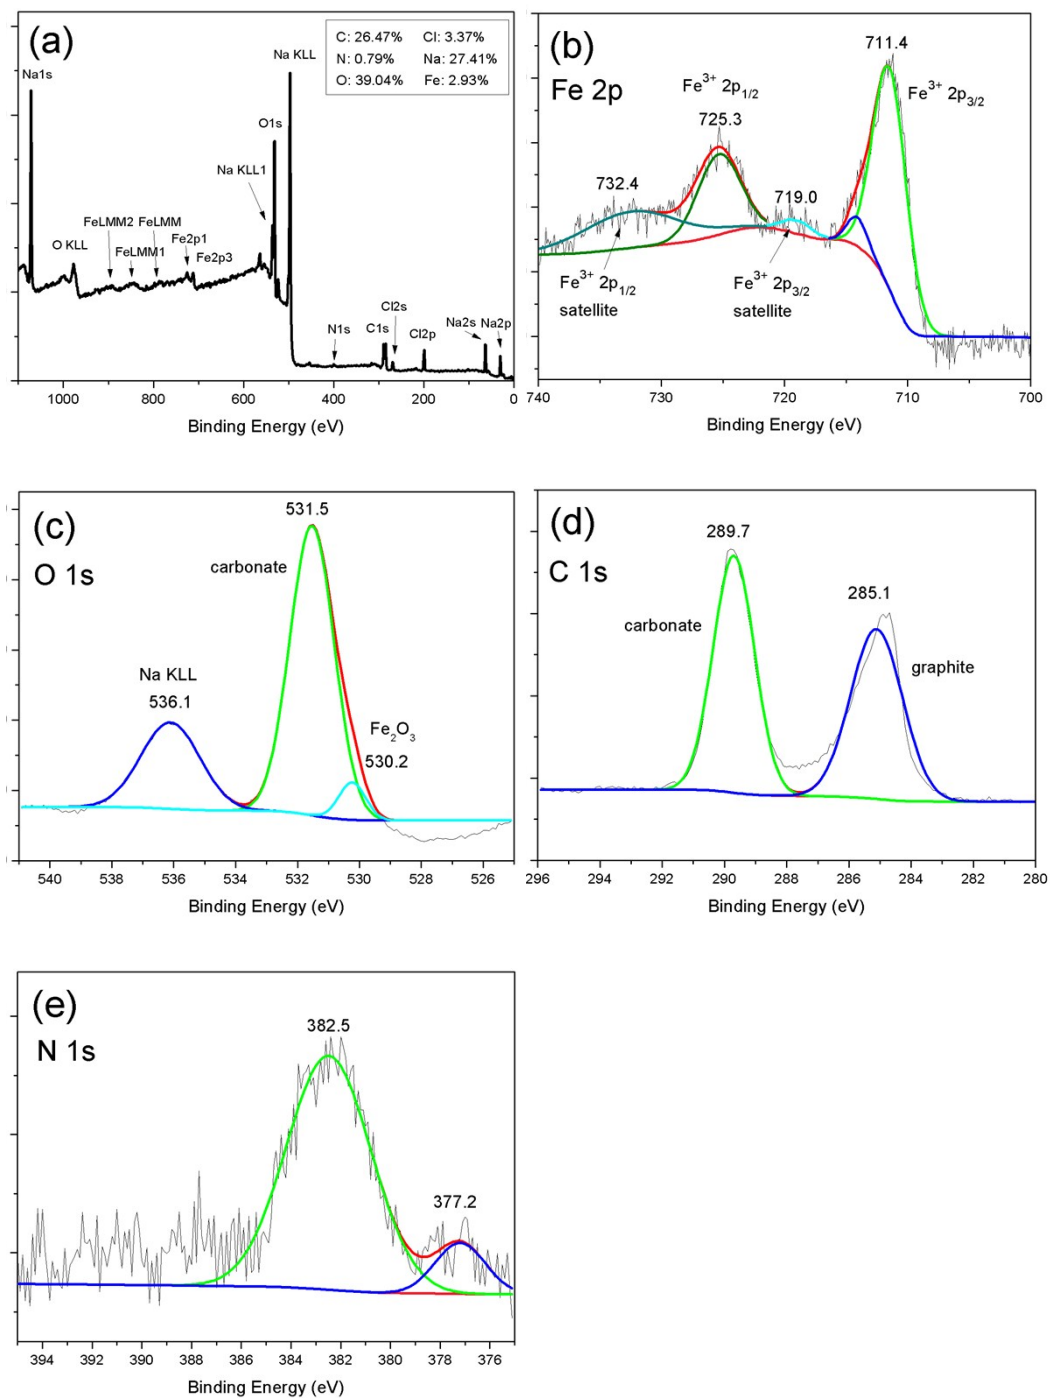

**Figure S26.** (a) Survey, (b) Fe 2p, (c) O 1s, (d) C 1s, and (e) N 1s XPS spectra of **Ox-electrode** (Cl element of survey spectrum may be from SCE reference electrode).

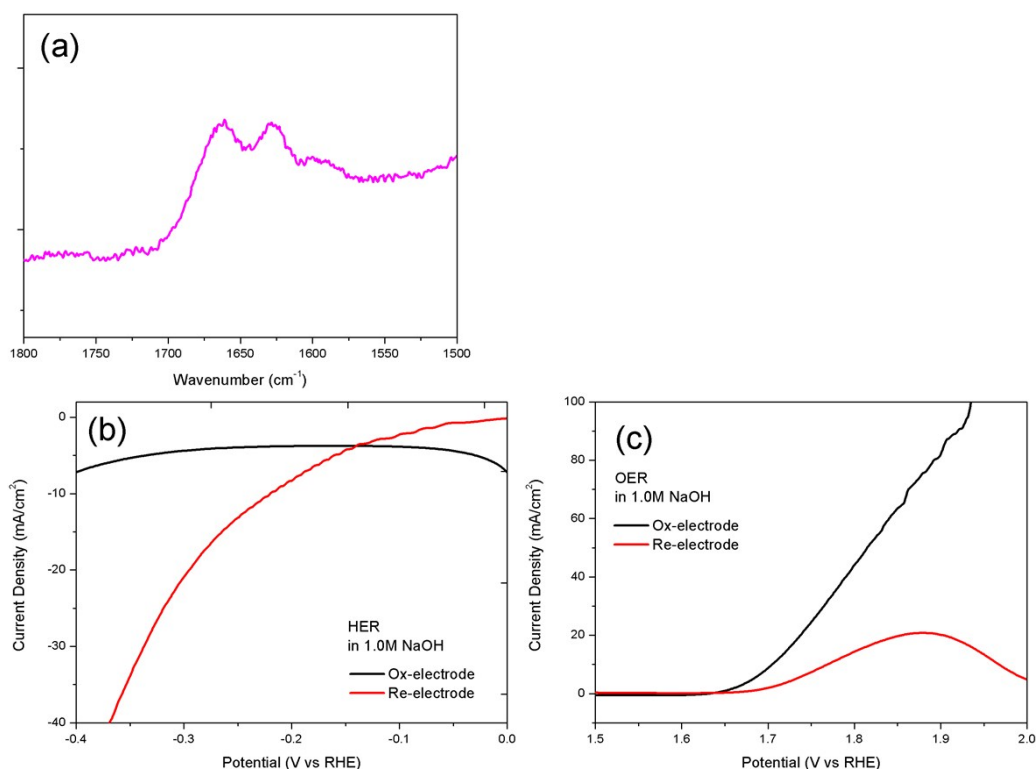

**Figure S27.** (a) ATR-IR spectrum of **Ox-electrode**. LSV curves of **Ox-electrode** (black) and **Re-electrode** (red) in 1.0 M NaOH<sub>(aq)</sub> for (b) HER and (c) OER, respectively (scan rate 2 mV/s). (Current densities mean geometrical current densities).

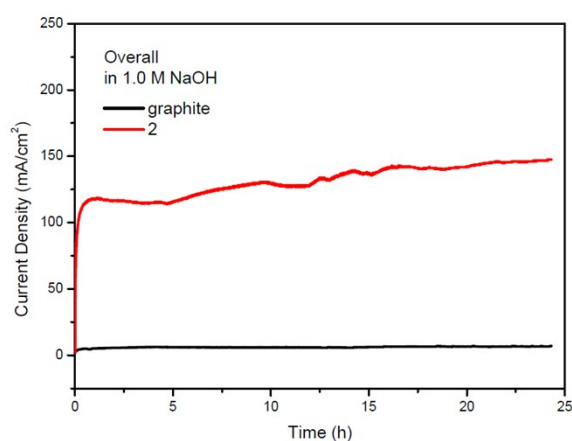

**Figure S28.** Changes of current density with time when graphite-electrode pair modified with CPE of blank (black) and **2** (3 mM) (red), respectively, in 1.0 M NaOH<sub>(aq)</sub> at applied voltage 2.20 V. (Current densities mean geometrical current densities).

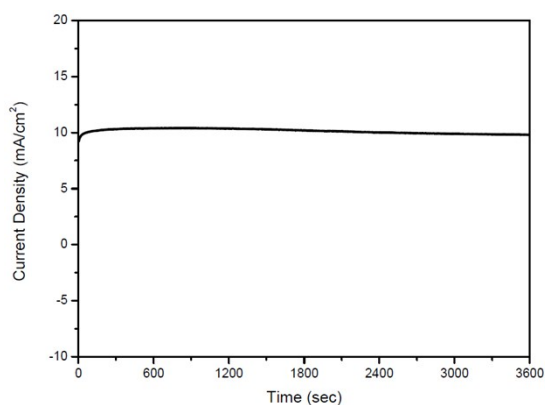

**Figure S29.** Current density of 10 mA/cm<sup>2</sup> for overall water splitting using **Redox-electrode** in 1.0 M NaOH<sub>(aq)</sub> at applied voltage 1.77 V. (Current densities mean geometrical current densities).

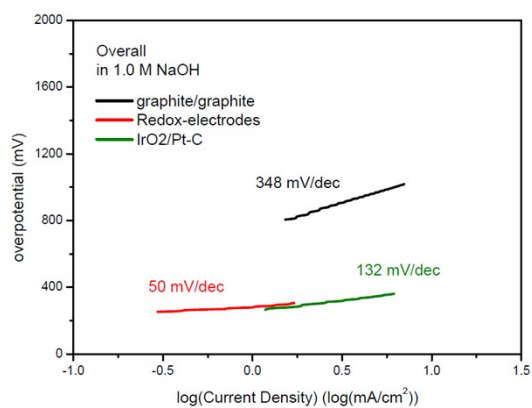

**Figure S30.** The corresponding Tafel plots of the fresh graphite-graphite (black), **Redox-electrodes** (red) and IrO<sub>2</sub>-Pt (green) two-electrode setting in 1.0 M NaOH<sub>(aq)</sub> for overall water splitting (scan rate 2 mV/s).

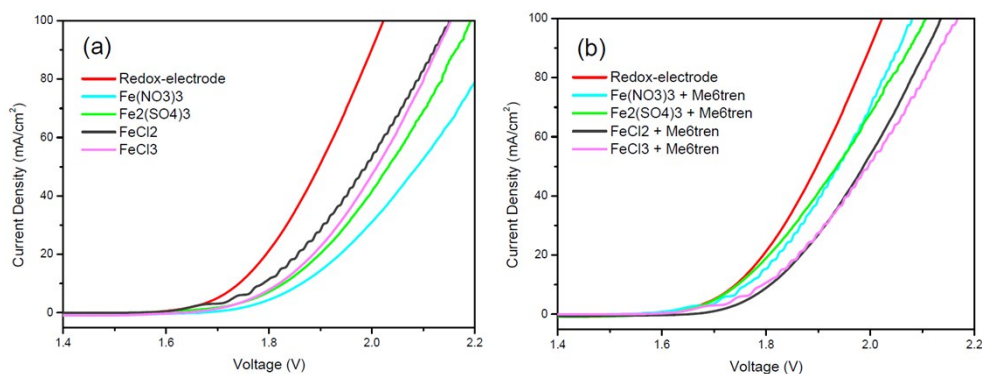

**Figure S31.** Polarized curves of overall water splitting for **Redox-electrode** and electrodeposited electrode-pair settings derived from (a) Fe salts and (b) Fe [salts+Me<sub>6</sub>tren] in 1.0 M NaOH<sub>(aq)</sub> (scan rate 2 mV/s). The electrodeposited two-electrode settings prepared by CPE of 1.0 M NaOH<sub>(aq)</sub> with 3 mM (a) Fe(NO<sub>3</sub>)<sub>3</sub>, Fe<sub>2</sub>(SO<sub>4</sub>)<sub>3</sub>, FeCl<sub>2</sub>, FeCl<sub>3</sub>, and 3 mM (b) [Fe(NO<sub>3</sub>)<sub>3</sub>+Me<sub>6</sub>tren], [Fe<sub>2</sub>(SO<sub>4</sub>)<sub>3</sub>+Me<sub>6</sub>tren], [FeCl<sub>2</sub>+Me<sub>6</sub>tren], [FeCl<sub>3</sub>+Me<sub>6</sub>tren], respectively, at applied voltage 2.20 V for 22 h using graphite as both anode and cathode. (Current densities mean geometrical current densities).

**Table S1.** Selected Janus catalysts.

| Catalysts                                                                            | Voltage (V) | Current Density (mA/cm <sup>2</sup> ) | pH | Reference                        |
|--------------------------------------------------------------------------------------|-------------|---------------------------------------|----|----------------------------------|
| <b>Redox-electrode</b>                                                               | 1.77        | 10                                    | 14 | This work                        |
| MoOx/Ni <sub>3</sub> S <sub>2</sub> /NF                                              | 1.45        | 10                                    | 14 | Adv. Funct. Mater., 2016, 4839   |
| N-Ni <sub>3</sub> S <sub>2</sub> /NF                                                 | 1.48        | 10                                    | 14 | Adv. Mater., 2017, 1701584       |
| Ni <sub>2</sub> P/NF                                                                 | 1.49        | 10                                    | 14 | ACS Catal., 2016, 714            |
| Cu@CoSx/CF                                                                           | 1.50        | 11                                    | 14 | Adv. Mater., 2016, 1606200       |
| NiFeOx                                                                               | 1.51        | 10                                    | 14 | Electrochim. Acta, 2015, 297     |
| Ni-Fe-P                                                                              | 1.52        | 10                                    | 14 | J. Mater. Chem. A, 2017, 2496    |
| CP@Ni-P                                                                              | 1.53        | 50.4                                  | 14 | Adv. Funct. Mater. 2016, 4067    |
| Ni <sub>x</sub> Co <sub>3-x</sub> S <sub>4</sub> /Ni <sub>3</sub> S <sub>2</sub> /NF | 1.53        | 10                                    | 14 | Nano Energy, 2017, 161           |
| Co <sub>2</sub> P/CNT                                                                | 1.53        | 10                                    | 14 | Nano Energy, 2016, 303           |
| NiFe-P                                                                               | 1.556       | 10                                    | 14 | J. Mater. Chem. A, 2016, 13866   |
| FeB <sub>2</sub>                                                                     | 1.57        | 10                                    | 14 | Adv. Energy Mater. 2017, 1700513 |
| Ni(OH) <sub>2</sub> @Ni/CC                                                           | 1.58        | 10                                    | 14 | J. Mater. Chem. A, 2017, 7744    |
| NiCoP                                                                                | 1.58        | 10                                    | 14 | Nano Lett. 2016, 7718            |
| Co <sub>9</sub> S <sub>8</sub> @NOSC                                                 | 1.60        | 10                                    | 14 | Adv. Funct. Mater. 2017, 1606585 |
| d-NiCo <sub>2</sub> NS/Ni/CF                                                         | 1.61        | 15                                    | 14 | J. Mater. Chem. A 2016, 18499    |
| FeNi <sub>3</sub> N/NF                                                               | 1.62        | 10                                    | 14 | Chem. Mater. 2016, 6934          |
| Ni <sub>0.7</sub> Fe <sub>0.3</sub> S <sub>2</sub>                                   | 1.625       | 10                                    | 14 | J. Mater. Chem. A 2017, 15838    |
| Ni <sub>2</sub> P                                                                    | 1.63        | 10                                    | 14 | EES, 2015, 2347                  |
| NiCo <sub>2</sub> S <sub>4</sub> NW/NF                                               | 1.63        | 10                                    | 14 | Adv. Funct. Mater. 2016, 4661    |
| NiCo <sub>2</sub> O <sub>4</sub>                                                     | 1.65        | 10                                    | 14 | ACIE, 2016, 6290                 |
| Ni <sub>3</sub> N/CMFs/Ni <sub>3</sub> N                                             | 1.652       | 20                                    | 14 | Mater. Chem. Front. 2017, 2155   |
| NiFe/NiCo <sub>2</sub> O <sub>4</sub> /NF                                            | 1.67        | 10                                    | 14 | Adv. Funct. Mater. 2016, 3515    |
| SNCF-NRs                                                                             | 1.68        | 10                                    | 14 | ChemCatChem 2017, 1721           |
| NiFe LDH/NF                                                                          | 1.70        | 10                                    | 14 | Science, 2014, 1593              |
| FeSe <sub>2</sub>                                                                    | 1.73        | 10                                    | 14 | ACIE, 2017, 10506                |
| CoSe                                                                                 | 1.75        | 10                                    | 14 | J. Mater. Chem. A 2016, 14789    |
| Ni <sub>3</sub> S <sub>2</sub> /NF                                                   | 1.76        | 13                                    | 14 | JACS, 2015, 14023                |
| Co <sub>2</sub> B-500                                                                | 1.81        | 10                                    | 14 | Adv. Energy Mater. 2016, 1502313 |
| NFPGN                                                                                | 1.90        | 10                                    | 14 | J. Mater. Chem. A 2017, 7784     |

|         |      |    |    |                                  |
|---------|------|----|----|----------------------------------|
| N,S-CNT | 2.03 | 10 | 14 | Adv. Energy Mater. 2017, 1602068 |
|---------|------|----|----|----------------------------------|

**Table S2.** Selected HER catalysts.

| Catalysts                                         | $\eta$<br>(10 mA/cm <sup>2</sup> ) | Tafel<br>Slope | pH   | Reference                       |
|---------------------------------------------------|------------------------------------|----------------|------|---------------------------------|
| <i>Fe HER catalysts</i>                           |                                    |                |      |                                 |
| <b>Re-electrode</b>                               | 160                                | 93             | 14   | This work                       |
| FeS <sub>2</sub>                                  | 96                                 | 78             | 13   | JACS, 2017, 13604               |
| Vc-FeP                                            | 108                                | 62             | 14   | CSSC, 2017, 1509                |
| FeP NAs/CC                                        | 218                                | 146            | 14   | ACScatal, 2014, 4065            |
| <i>Metal doping Fe HER catalysts</i>              |                                    |                |      |                                 |
| FeNi <sub>3</sub> N                               | 75                                 | 98             | 14   | Chem. Mater. 2016, 6934         |
| <i>Non-Fe HER catalysts in alkaline condition</i> |                                    |                |      |                                 |
| MoNi <sub>4</sub>                                 | 15                                 | 30             | 14   | NatComm, 2017, 15437            |
| Porous-MoO <sub>2</sub>                           | 27                                 | 41             | 14   | Adv. Mater., 2016, 3785         |
| NiCoP                                             | 32                                 | 37             | 14   | Nano Lett. 2016, 7718           |
| NiMo                                              | 34 (20)                            |                | 14   | ChemElectroChem, 2014, 1138     |
| WO <sub>2</sub> HN                                | 48                                 | 43             | 14   | J. Mater. Chem. A, 2017, 9655   |
| Ni <sub>5</sub> P <sub>4</sub>                    | 49                                 | 98             | 14   | EES, 2015, 1027                 |
| Cu <sub>95</sub> Ti <sub>5</sub>                  | 60                                 | 110            | 13   | NatComm, 2015, 6567             |
| Ni(OH) <sub>2</sub> @Ni                           | 68                                 | 97             | 14   | J. Mater. Chem. A, 2017, 7744   |
| NiMo                                              | 70 (20)                            |                | 14.3 | ACScatal, 2013, 166             |
| CoO                                               | 73                                 | 82             | 14   | NatComm, 2017, 1509             |
| MoC                                               | 77                                 | 50             | 14   | J. Mater. Chem. A, 2016, 6006   |
| WC-CNT                                            | 137                                | 106            | 13   | ACS.Nano, 2015, 5125            |
| NiO/Ni-CNT                                        | <100                               | 82             | 14   | NatComm, 2014, 4695             |
| N-NiO                                             | 100                                | 112.58         | 14   | ChemSusChem, 2018, 1020         |
| MoCx                                              | 151                                | 59             | 14   | NatComm, 2015, 7512             |
| Co-NRCNT                                          | 160 (1)                            |                | 14   | ACIE, 2014, 4372                |
| CoMo                                              | 170 (100)                          | 92             | 14.8 | J. Electrochem. Soc., 1994, 382 |
| CoNx                                              | 170                                | 75             | 14   | NatComm, 2015, 7992             |
| c-CoSe <sub>2</sub> /CC                           | 190                                | 85             | 14   | Adv. Mater., 2016, 7527         |
| Ni <sub>2</sub> P                                 | 205                                |                | 14   | JACS, 2013, 9267                |
| NiCo <sub>2</sub> S <sub>4</sub> /NF              | 210                                | 58.9           | 14   | Adv. Funct. Mater., 2016, 4661  |

|                  |     |     |    |                                |
|------------------|-----|-----|----|--------------------------------|
| CoS <sub>2</sub> | 244 | 133 | 14 | Electrochimica Acta, 2014, 170 |
|------------------|-----|-----|----|--------------------------------|

**Table S3.** Selected OER catalysts.

| Catalysts                                                                                                       | $\eta$<br>(1 mA/cm <sup>2</sup> ) | Tafel<br>Slope | pH  | Reference                        |
|-----------------------------------------------------------------------------------------------------------------|-----------------------------------|----------------|-----|----------------------------------|
| <i>Fe OER catalysts</i>                                                                                         |                                   |                |     |                                  |
| <b>Ox-electrode</b>                                                                                             | 380                               | 40             | 14  | This work                        |
| FeOx                                                                                                            | 445                               | 40             | 14  | J. Electrochem. Soc., 2013, H142 |
| FeOx                                                                                                            | 405                               | 51             | 14  | JACS, 2012, 17253                |
| Fe <sub>2</sub> O <sub>3</sub>                                                                                  | 430                               | 64             | 14  | NanoLett, 2014, 2123             |
| FeOx                                                                                                            | 410                               | 40             | 13  | Science, 2013, 60                |
| FeOOH                                                                                                           | 420                               |                | 11  | JACS, 2014, 2843                 |
| <i>Metal doping Fe OER catalysts</i>                                                                            |                                   |                |     |                                  |
| NiFeOx                                                                                                          | 297                               | 30             | 14  | JACS, 2012, 17253                |
| NiFeOx                                                                                                          | 120                               | 32             | 15  | NatComm, 2015, 6616              |
| NiFeOx                                                                                                          | 210                               | 31             | 14  | JACS, 2013, 8452                 |
| Fe <sub>2</sub> Ni <sub>3</sub> Ox                                                                              | 250                               | 34             | 13  | JACS, 2013, 11580                |
| FeCoW<br>oxyhydroxides                                                                                          | 191 (10)                          |                | 14  | Science, 2016, 333               |
| Ba <sub>0.5</sub> Sr <sub>0.5</sub> Co <sub>0.8</sub> -<br>Fe <sub>0.2</sub> O <sub>3-<math>\delta</math></sub> | 320                               | 60             | 13  | Science, 2011, 1383              |
| $\alpha$ -Fe <sub>33</sub> Co <sub>33</sub> Ni <sub>33</sub> Ox                                                 | 230                               | 30             | 13  | Science, 2013, 60                |
| <i>Non-Fe OER catalysts</i>                                                                                     |                                   |                |     |                                  |
| NiCoOx                                                                                                          | 312                               | 33             | 14  | JACS, 2012, 17253                |
| NiCoOx                                                                                                          | 370                               |                | 13  | ChemComm, 2015, 9511             |
| NiMnOx                                                                                                          | 300                               | 47             | 14  | J. Mater. Chem. A, 2015, 20056   |
| NiCoCeOx                                                                                                        | 250                               | 60             | 14  | EES, 2014, 682                   |
| Co <sub>3</sub> O <sub>4</sub>                                                                                  | 300                               | 49             | 14  | Chem. Mater., 2012, 3567         |
| CoP                                                                                                             | 345 (10)                          | 47             | 14  | ACIE, 2015, 6251                 |
| CoMnP                                                                                                           | 330 (10)                          | 61             | 14  | JACS, 2016, 4006                 |
| NiOx                                                                                                            | 320 (10)                          | 52             | 14  | JACS, 2016, 6517                 |
| MnOx                                                                                                            | <300                              |                | 13  | JACS, 2010, 13612                |
| NiOx                                                                                                            | 380                               | 30             | 9.2 | JACS, 2013, 3662                 |
| CoOx                                                                                                            | 410                               | 60             | 7   | Science, 2008, 1072              |
